# Supplementary material for: 1H NMR Metabolic Profiling and Meat Quality in Three Beef Cattle Breeds from Northeastern Thailand
Source: MDPI journal article supplement (doi:10.3390/foods11233821), 2022-11-26
Supplement: s1 [file s1]

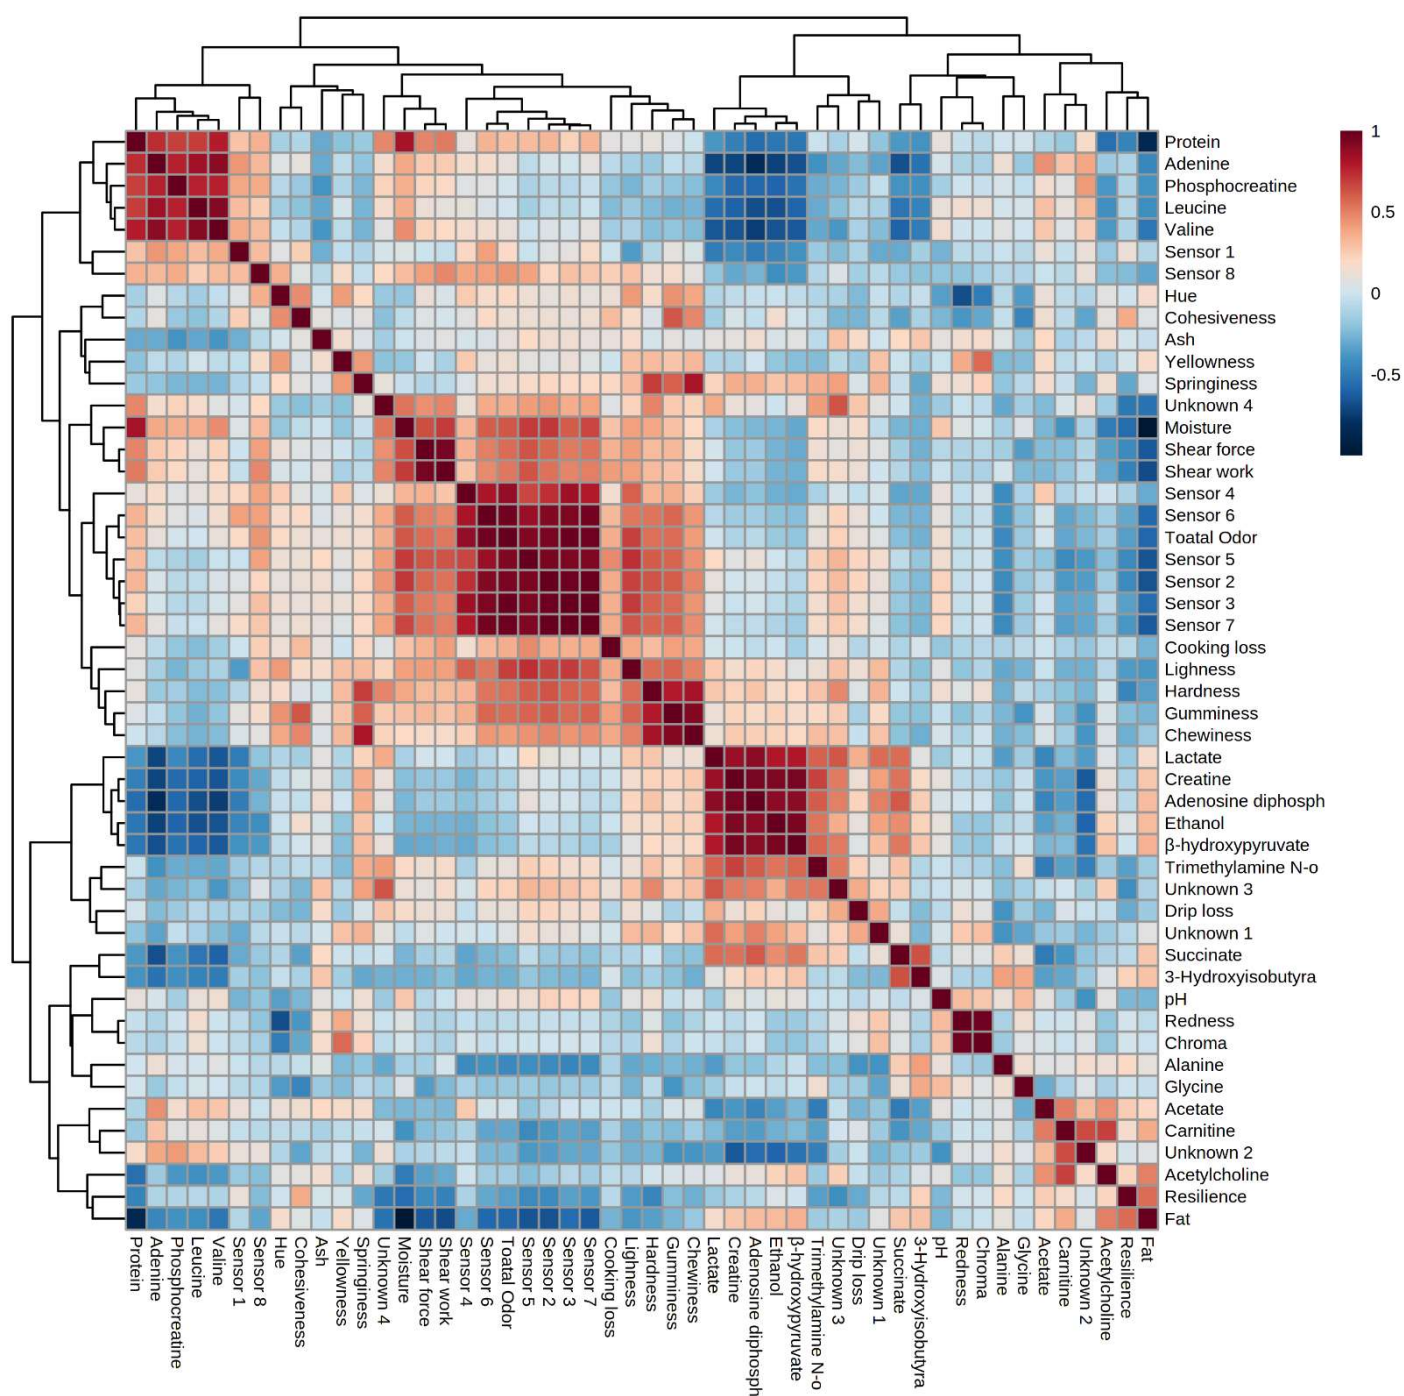

**Figure S1.** Correlation heatmaps between relative metabolite concentrations and beef quality: TN, Thai native beef; BT, Brahman × Thai native beef; CB, Charolaise × Brahman beef. Metabolites data were pareto scaled and analyzed with Pearson correlation in MetaboAnalyst 5.0 software. The top-right color key on the map indicates the expression values where the highly negative correlations are represented by dark blue, highly positive ones by dark red.

## Compounds correlated with the Shear force

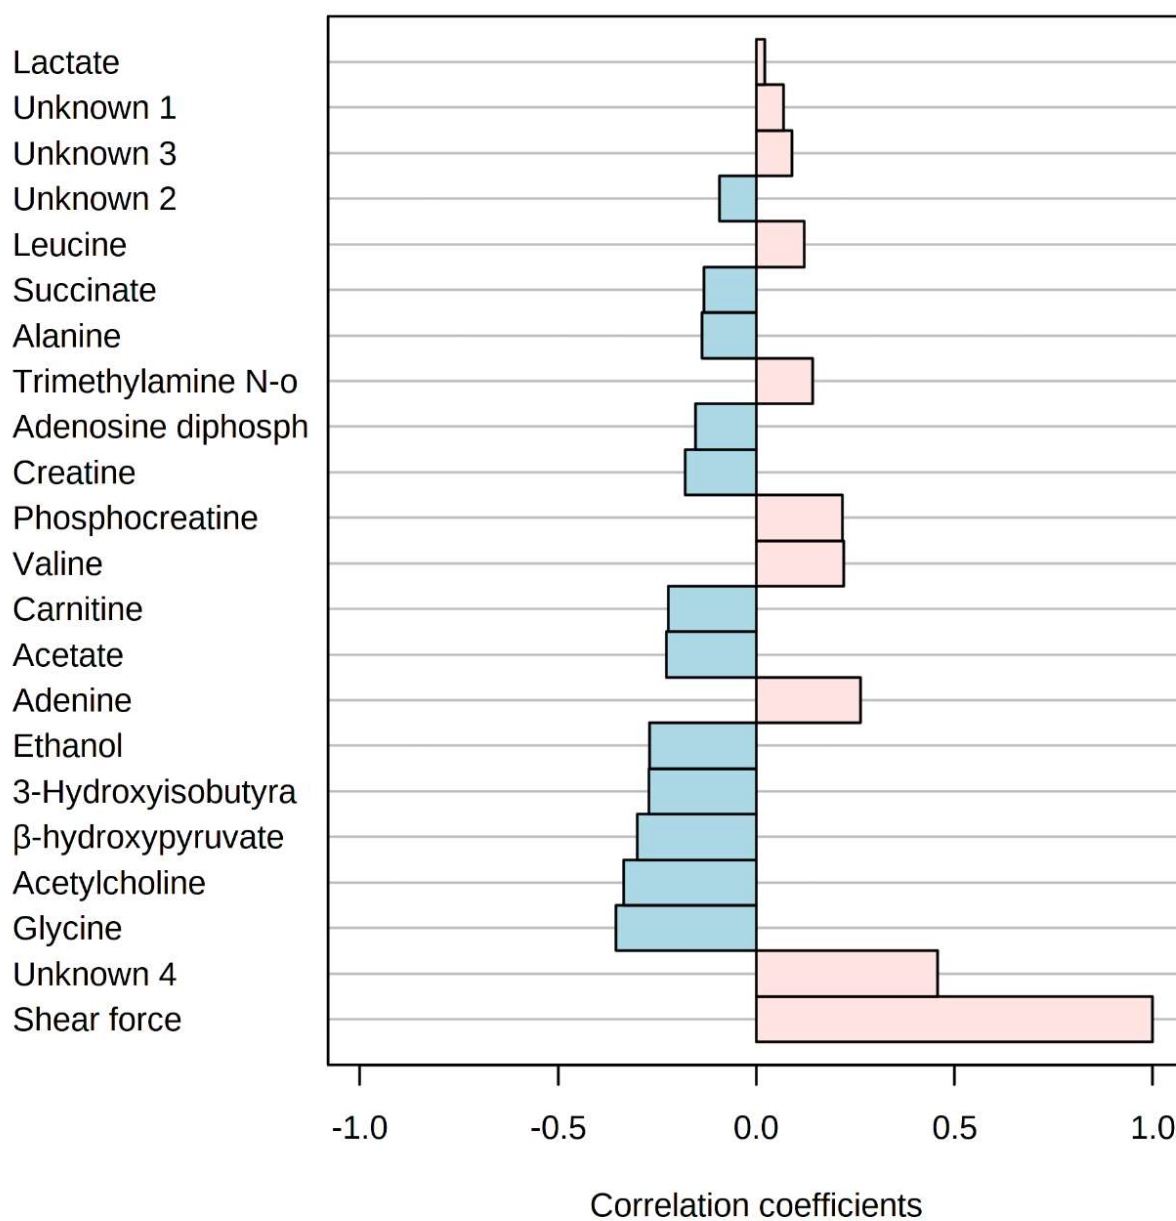

**Figure S2.** Top 21 shear force-associated metabolites using Pearson correlation in MetaboAnalyst 5.0 software.

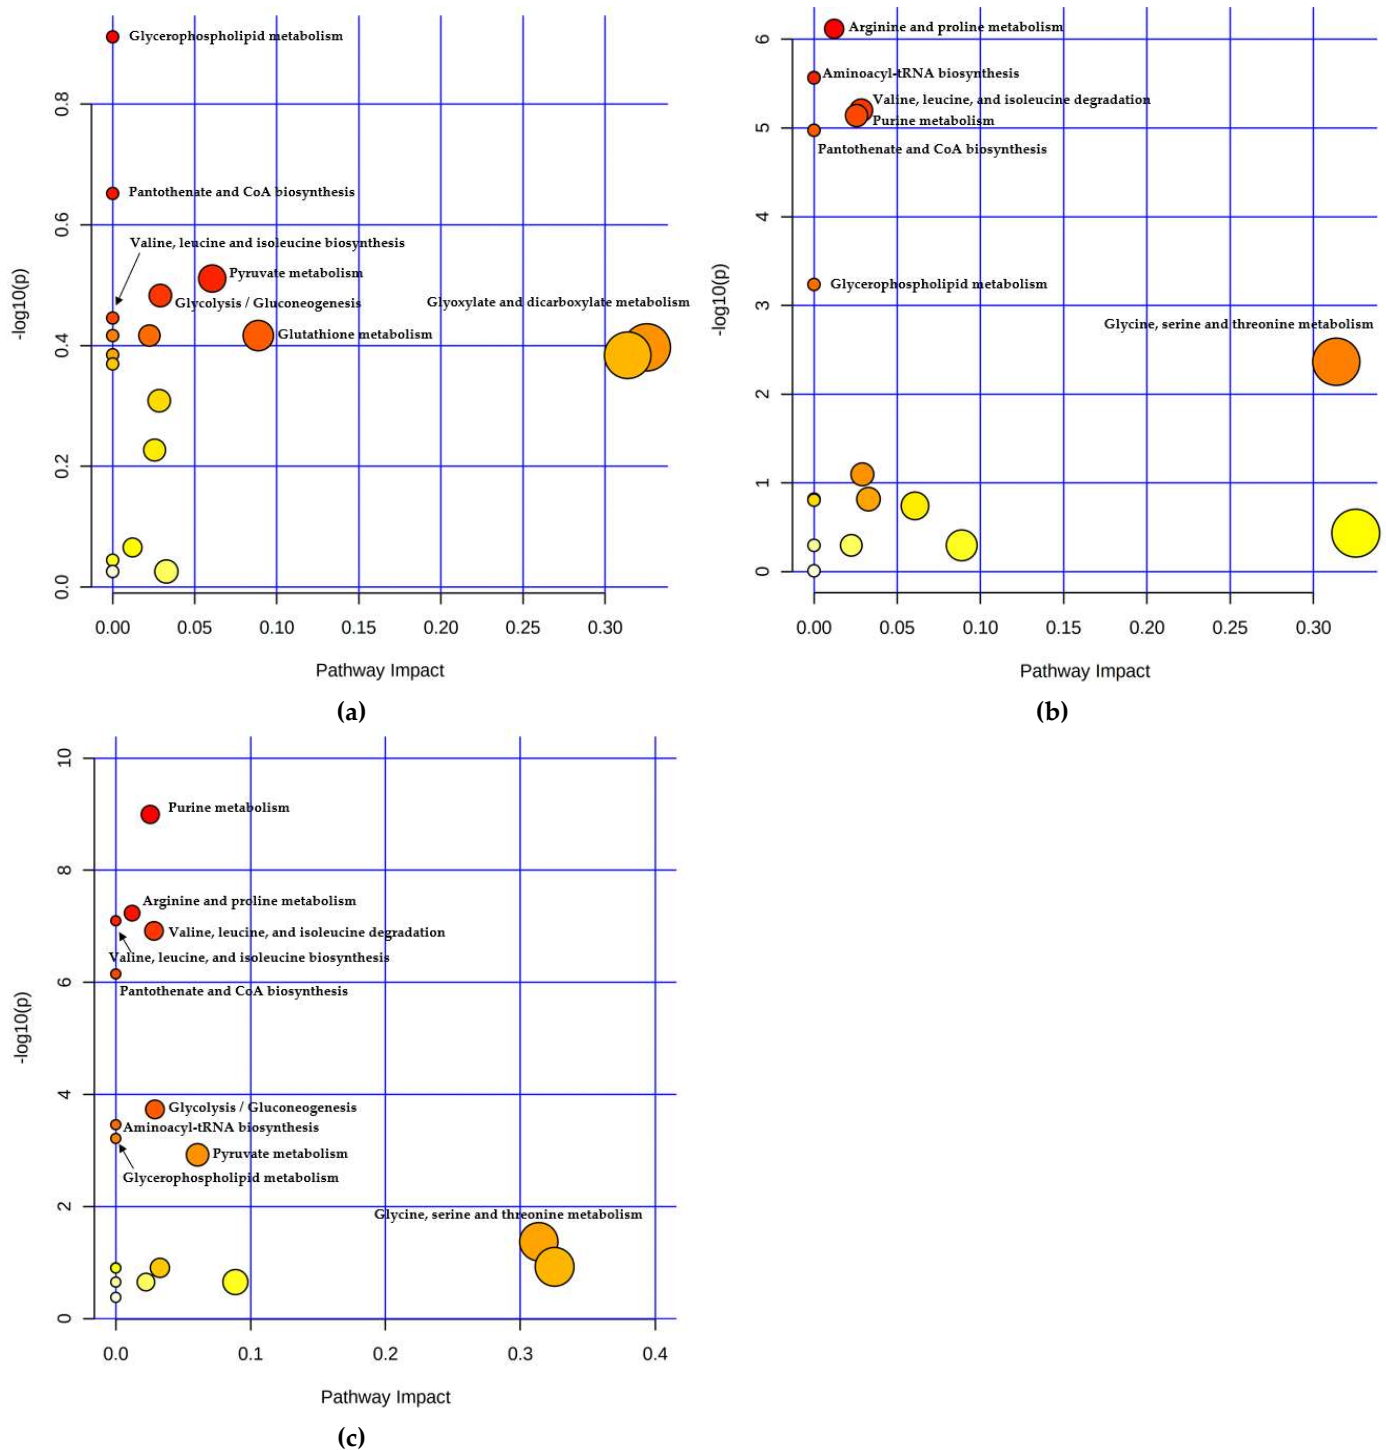

**Figure S3.** Metabolic pathways mapping of beef metabolites between TN and BT (**a**,  $p > 0.05$ ), TN and CB (**b**,  $p < 0.05$ ), and BT and CB (**c**,  $p < 0.05$ ) revealed by *Bos taurus* (KEGG) library-based analysis using the MeatboAnalyst 5.0 software. The mapping displays the different pathways that were compared based on their  $p$  values in the topological and enrichment analyses. The larger and darker bubble plot shows the higher  $p$  values.

**Table S1.** Major metabolic pathways ( $p < 0.05$ ) uncovered by *Bos taurus* (KEGG) library-based analysis.

| Pathway Name                                 | Match Status | $p$                   | $-\log(p)$ | Holm $p$              | FDR                   | Impact |
|----------------------------------------------|--------------|-----------------------|------------|-----------------------|-----------------------|--------|
| <i>TN vs BT</i> <sup>a</sup>                 |              |                       |            |                       |                       |        |
| -                                            |              |                       |            |                       |                       |        |
| <i>TN vs CB</i>                              |              |                       |            |                       |                       |        |
| Arginine and proline metabolism              | 2/38         | $7.63 \times 10^{-7}$ | 6.12       | $1.45 \times 10^{-5}$ | $1.45 \times 10^{-5}$ | 0.01   |
| Valine, leucine, and isoleucine biosynthesis | 2/8          | $2.70 \times 10^{-6}$ | 5.56       | $4.86 \times 10^{-5}$ | $1.73 \times 10^{-5}$ | 0.00   |
| Aminoacyl-tRNA biosynthesis                  | 4/48         | $2.73 \times 10^{-6}$ | 5.56       | $4.86 \times 10^{-5}$ | $1.73 \times 10^{-5}$ | 0.00   |
| Valine, leucine, and isoleucine degradation  | 3/40         | $6.34 \times 10^{-6}$ | 5.19       | $1.01 \times 10^{-4}$ | $2.75 \times 10^{-5}$ | 0.03   |
| Purine metabolism                            | 2/66         | $7.24 \times 10^{-6}$ | 5.14       | $1.09 \times 10^{-4}$ | $2.75 \times 10^{-5}$ | 0.03   |
| Pantothenate and CoA biosynthesis            | 1/19         | $1.06 \times 10^{-5}$ | 4.97       | $1.49 \times 10^{-4}$ | $3.35 \times 10^{-5}$ | 0.00   |
| Glycerophospholipid metabolism               | 1/36         | $5.80 \times 10^{-4}$ | 3.24       | 0.007                 | 0.0015                | 0.00   |
| Glycine, serine, and threonine metabolism    | 3/34         | 0.0043                | 2.36       | 0.052                 | 0.0102                | 0.31   |
| <i>BT vs CB</i>                              |              |                       |            |                       |                       |        |
| Purine metabolism                            | 2/66         | $1.01 \times 10^{-9}$ | 8.99       | $1.92 \times 10^{-8}$ | $1.92 \times 10^{-8}$ | 0.03   |
| Arginine and proline metabolism              | 2/38         | $5.83 \times 10^{-8}$ | 7.23       | $1.05 \times 10^{-6}$ | $5.05 \times 10^{-7}$ | 0.01   |
| Valine, leucine, and isoleucine biosynthesis | 2/8          | $7.97 \times 10^{-8}$ | 7.09       | $1.36 \times 10^{-6}$ | $5.05 \times 10^{-7}$ | 0.00   |
| Valine, leucine, and isoleucine degradation  | 3/40         | $1.21 \times 10^{-7}$ | 6.92       | $1.94 \times 10^{-6}$ | $5.74 \times 10^{-7}$ | 0.03   |
| Pantothenate and CoA biosynthesis            | 1/19         | $7.07 \times 10^{-7}$ | 6.15       | $1.06 \times 10^{-5}$ | $2.69 \times 10^{-6}$ | 0.00   |
| Glycolysis / Gluconeogenesis                 | 3/26         | $1.85 \times 10^{-4}$ | 3.73       | 0.0025                | $5.85 \times 10^{-4}$ | 0.03   |
| Aminoacyl-tRNA biosynthesis                  | 4/48         | $3.46 \times 10^{-4}$ | 3.46       | 0.0045                | $9.39 \times 10^{-4}$ | 0.00   |
| Glycerophospholipid metabolism               | 1/36         | $6.09 \times 10^{-4}$ | 3.22       | 0.0073                | 0.0014                | 0.00   |
| Pyruvate metabolism                          | 2/22         | 0.0012                | 2.92       | 0.0131                | 0.0025                | 0.06   |
| Glycine, serine, and threonine metabolism    | 3/34         | 0.0423                | 1.37       | 0.4239                | 0.0805                | 0.31   |

FDR, False recovery rate; TN, Thai native beef; BT, Brahman × Thai native beef; CB, Charolaise × Brahman beef

<sup>a</sup>Nineteen pathways were analyzed, and none of them showed statistical significance ( $p > 0.05$ ).
